# Supplementary material for: Potential hypoglycemic metabolites in dark tea fermented by Eurotium cristatum based on UPLC-QTOF-MS/MS combining global metabolomic and spectrum–effect relationship analyses
Source: Royal Society of Chemistry journal article supplement (doi:10.1039/d1fo00836f), 2021-01-01
Supplement: d1fo00836f1.pdf [file d1fo00836f1.pdf]

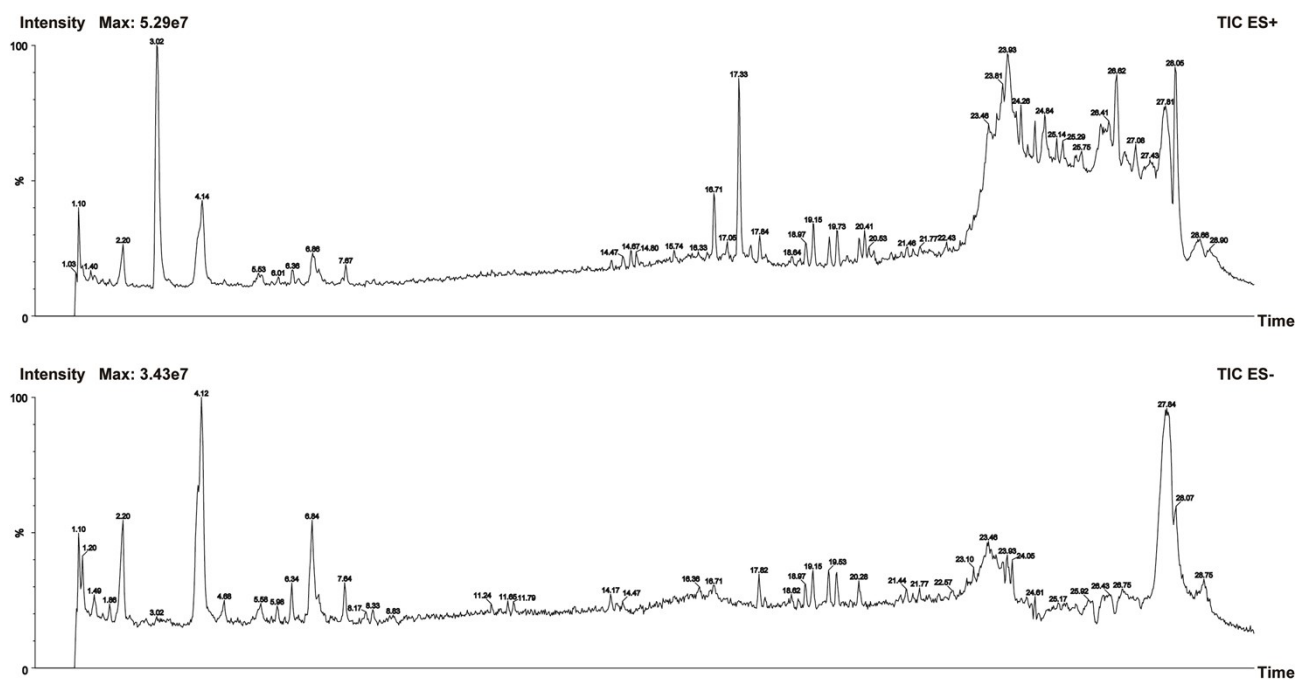

**S Figure 1.** The total ion chromatogram of representative sample in positive and negative ion mode.
