# Supplementary material for: Potential hypoglycemic metabolites in dark tea fermented by Eurotium cristatum based on UPLC-QTOF-MS/MS combining global metabolomic and spectrum–effect relationship analyses
Source: Royal Society of Chemistry journal article supplement (doi:10.1039/d1fo00836f), 2021-01-01
Supplement: d1fo00836f2.pdf [file d1fo00836f2.pdf]

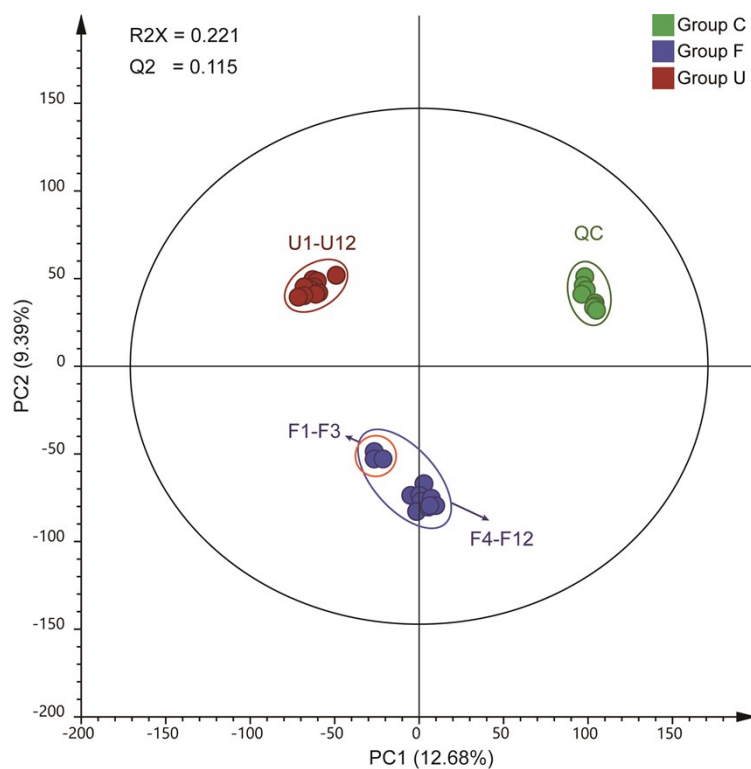

**S Figure 2.** PCA scores scatter plot of unfermented material samples (group U), fermented samples (group F) and quality control samples (group C). Three samples with 1-year fermentation time were extra encircled by orange circle in group F.
