# Supplementary material for: Potential hypoglycemic metabolites in dark tea fermented by Eurotium cristatum based on UPLC-QTOF-MS/MS combining global metabolomic and spectrum–effect relationship analyses
Source: Royal Society of Chemistry journal article supplement (doi:10.1039/d1fo00836f), 2021-01-01
Supplement: d1fo00836f5.pdf [file d1fo00836f5.pdf]

**S Table 1.  $\alpha$ -Glucosidase inhibition of each sample in different groups.**

|   | 1     | 2     | 3     | 4     | 5     | 6     | 7     | 8     | 9     | 10    | 11    | 12    | Mean $\pm$ SD      |
|---|-------|-------|-------|-------|-------|-------|-------|-------|-------|-------|-------|-------|--------------------|
| U | 35.45 | 35.49 | 35.82 | 38.15 | 35.97 | 37.96 | 35.85 | 37.68 | 39.00 | 34.18 | 36.05 | 36.79 | 36.53 $\pm$ 1.34   |
| F | 59.22 | 62.07 | 61.44 | 69.84 | 68.53 | 69.02 | 65.29 | 71.03 | 69.21 | 69.21 | 67.22 | 62.47 | 66.21 $\pm$ 3.79** |

Sample serial numbers were depicted in first row; Groups were depicted in first column.

“F” and “U” meant fermented samples and unfermented materials, respectively.

“\*\*\*” indicated  $P < 0.01$  in  $t$ -test.
