# Supplementary material for: Potential hypoglycemic metabolites in dark tea fermented by Eurotium cristatum based on UPLC-QTOF-MS/MS combining global metabolomic and spectrum–effect relationship analyses
Source: Royal Society of Chemistry journal article supplement (doi:10.1039/d1fo00836f), 2021-01-01
Supplement: d1fo00836f6.pdf [file d1fo00836f6.pdf]

**S Table 2.** Identification or characterization results of 15 selected metabolites in UPLC-QTOF-MS/MS analysis.

| No. | RT (min) | Structures / name*              | Formula                                                        | Exact mass | Parent ions                                                        | MS/MS                                                                                                                       |
|-----|----------|---------------------------------|----------------------------------------------------------------|------------|--------------------------------------------------------------------|-----------------------------------------------------------------------------------------------------------------------------|
| C1  | 20.18    | Epoxy-octadecadienoic acid      | C <sub>18</sub> H <sub>30</sub> O <sub>3</sub>                 | 294.2195   | [M+H] <sup>+</sup> 295.2263<br>[M-H] <sup>-</sup> 293.2099         | 179.1407, 149.1327, 133.1013, 107.0837<br>275.2034, 209.1170, 177.1295                                                      |
| C2  | 20.28    | 18:1 / Lyso-PC                  | C <sub>26</sub> H <sub>52</sub> NO <sub>7</sub> P              | 521.3481   | [M+H] <sup>+</sup> 522.3542<br>[M+HCOOH-H] <sup>-</sup> 566.3468 - | 504.3393, 485.2601, 339.2883, 184.0737, 124.9992, 104.1065                                                                  |
| C3  | 19.73    | 16:0 / Lyso-PC                  | C <sub>24</sub> H <sub>50</sub> NO <sub>7</sub> P              | 495.3325   | [M+H] <sup>+</sup> 496.3388<br>[M+HCOOH-H] <sup>-</sup> 540.3293 - | 184.0737, 124.9992, 104.1065                                                                                                |
| C4  | 23.59    | Masticadienonic acid            | C <sub>30</sub> H <sub>46</sub> O <sub>3</sub>                 | 454.3447   | [M+H] <sup>+</sup> 455.3511<br>[M-H] <sup>-</sup> 453.3354         | 437.3383, 419.3329, 381.3184, 355.2989, 311.2339, 251.1994,<br>113.0597<br>409.3438, 355.2960                               |
| C5  | 19.33    | Lyso-PC / 16:0                  | C <sub>24</sub> H <sub>50</sub> NO <sub>7</sub> P              | 495.3325   | [M+H] <sup>+</sup> 496.3388<br>[M+HCOOH-H] <sup>-</sup> 540.3293 - | 184.0737, 124.9992, 104.1085                                                                                                |
| C6  | 22.35    | Camelledionol                   | C <sub>29</sub> H <sub>44</sub> O <sub>3</sub>                 | 440.3290   | [M+H] <sup>+</sup> 441.3355<br>[M-H] <sup>-</sup> 439.3244         | 423.3229, 273.1879, 213.1623<br>409.3107, 219.1388, 125.0979                                                                |
| C7  | 14.51    | Trihydroxy-octadecenoic acid    | C <sub>18</sub> H <sub>34</sub> O <sub>5</sub>                 | 330.2406   | [M+H] <sup>+</sup> 331.2482<br>[M-H] <sup>-</sup> 329.2307         | 313.2370, 295.2263, 267.2346, 169.1243, 135.1202<br>311.2196, 293.2099, 183.1367, 157.0879                                  |
| C8  | 19.09    | Dehydrated dyphylline-Glc-C16:0 | C <sub>32</sub> H <sub>54</sub> N <sub>4</sub> O <sub>10</sub> | 654.3840   | [M+H] <sup>+</sup> 655.3870<br>[M-H] <sup>-</sup> 653.3713         | 537.3031, 515.3165, 313.2750<br>415.1392, 397.1323, 255.2326, 253.0912, 235.0803, 179.0559,<br>161.0441, 116.9270, 101.0238 |
| C9  | 17.59    | Octadecanedioic acid            | C <sub>18</sub> H <sub>34</sub> O <sub>4</sub>                 | 314.2457   | [M+H] <sup>+</sup> 315.2537<br>[M-H] <sup>-</sup> 313.2385         | 235.2082, 139.1456, 125.1320<br>295.2294, 223.2439, 197.1530, 113.0605                                                      |
| C10 | 19.88    | Hydroxy-octadecatrienoic acid   | C <sub>18</sub> H <sub>30</sub> O <sub>3</sub>                 | 294.2195   | [M+H] <sup>+</sup> 295.2263                                        | 277.2205, 259.2044, 231.2117, 217.1964, 177.1661, 163.1482,<br>147.1180, 137.1351, 119.0863                                 |

|     |       |                                                           |                                                 |                             |                                                                                                        |
|-----|-------|-----------------------------------------------------------|-------------------------------------------------|-----------------------------|--------------------------------------------------------------------------------------------------------|
|     |       |                                                           |                                                 | [M-H] <sup>-</sup> 293.2099 | 275.2000, 249.2199, 137.0936                                                                           |
|     |       |                                                           |                                                 | [M+H] <sup>+</sup> 757.1896 | 447.0928, 309.0934, 285.0356, 147.0460, 119.0506                                                       |
| C11 | 11.48 | Hydroxycinnamaldehyde-<br>Glc-Glc-<br>Tetrahydroxyflavone | C <sub>36</sub> H <sub>36</sub> O <sub>18</sub> | 756.1902                    | [M-H] <sup>-</sup> 755.1750<br>591.1326, 429.0802, 283.0233, 151.0016, 145.0281, 117.0333              |
|     |       |                                                           |                                                 | [M+H] <sup>+</sup> 307.0821 | 289.0710, 163.0384, 151.0403, 139.0394, 121.0278                                                       |
| C12 | 2.20  | Epigallocatechin                                          | C <sub>15</sub> H <sub>14</sub> O <sub>7</sub>  | 306.0740                    | [M-H] <sup>-</sup> 305.0661<br>261.0754, 219.0661, 179.0340, 165.0180, 137.0240, 125.0246,<br>109.0300 |
|     |       |                                                           |                                                 | [M+H] <sup>+</sup> 273.0763 | 255.0636, 179.0339                                                                                     |
| C13 | 6.86  | Trihydroxyflavanone                                       | C <sub>15</sub> H <sub>12</sub> O <sub>5</sub>  | 272.0685                    | [M-H] <sup>-</sup> 271.0581<br>253.0488, 177.0177, 151.0041                                            |
|     |       |                                                           |                                                 | [M+H] <sup>+</sup> 291.0887 | 205.9647, 165.0564, 163.0384, 147.0435, 139.0394, 123.0441                                             |
| C14 | 4.05  | Epicatechin                                               | C <sub>15</sub> H <sub>14</sub> O <sub>6</sub>  | 290.0790                    | [M-H] <sup>-</sup> 289.0698<br>245.0802, 203.0705, 137.0240, 125.0246, 123.0452                        |
|     |       |                                                           |                                                 | [M+H] <sup>+</sup> 565.1548 | 287.0567                                                                                               |
| C15 | 5.58  | Ara-Rha-<br>Tetrahydroxyflavone                           | C <sub>26</sub> H <sub>28</sub> O <sub>14</sub> | 564.1479                    | [M-H] <sup>-</sup> 563.1401<br>431.0930, 285.0421, 151.0016                                            |

Ara, arabinoside; Rha, rhamnoside; Glc, glucoside.

\* Due to limits of UPLC-QTOF-MS/MS, locations of double bonds in fatty acids, the hydroxyls in flavonoids or the substituent groups could not be determined.
