# Supplementary figures and images for: Potential hypoglycemic metabolites in dark tea fermented by Eurotium cristatum based on UPLC-QTOF-MS/MS combining global metabolomic and spectrum–effect relationship analyses
Source: Royal Society of Chemistry journal article supplement (doi:10.1039/d1fo00836f), 2021-01-01

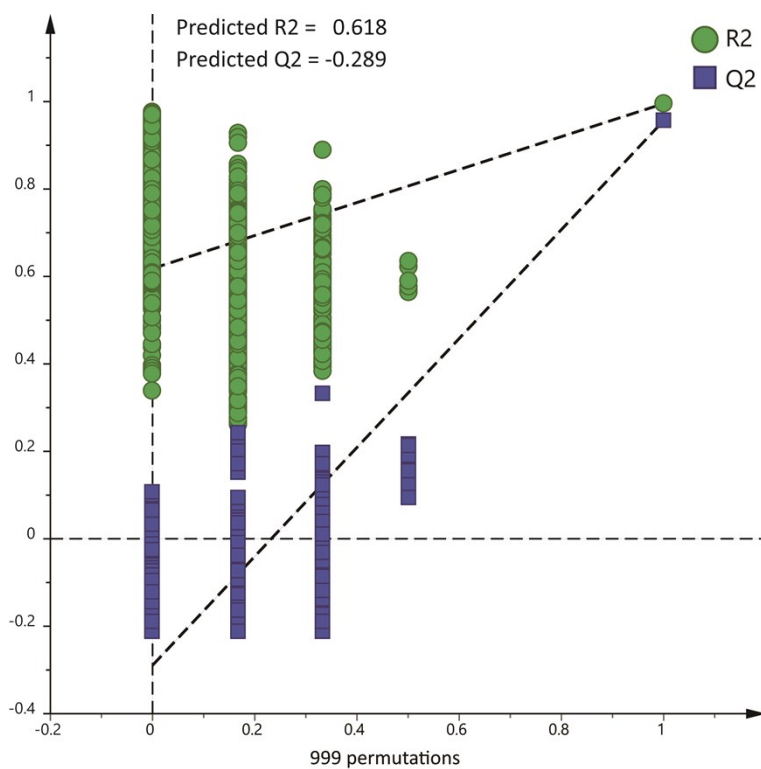

Supplement: d1fo00836f3.pdf [file d1fo00836f3.pdf]
